# Supplementary material
Source: publisher site journal article supplement (https://static.cambridge.org/content/id/urn:cambridge.org:id:article:S1092852919001706/resource/name/S1092852919001706supp001.docx)
Supplement: Supplementary file 1 [file S1092852919001706supp001.docx]

Appendix: Correlation between Habit, fear and reward sub-scores and other self-report instruments.

|  | **Fear** | **Habit** | **Reward** |
| --- | --- | --- | --- |
| **BIS/BAS (n=100, AUD and OCD patients)** |  |  |  |
| **Drive** | -.064 | -.092 | .202* |
| **Fun Seeking** | .082 | .127 | .424** |
| **Reward** | .106 | .035 | .163 |
| **BIS** | .117 | .048 | -.112 |
| **UPPS-P (n=100, AUD and OCD patients)** |  |  |  |
| **Negative Urgency** | -.106 | -.084 | .349** |
| **Positive Urgency** | -.054 | .029 | .530** |
| **Sensation Seeking** | -.066 | -.067 | .481** |
| **Lack of Premeditation** | -.055 | .159 | .252* |
| **lack of perseverance** | .078 | .129 | .028 |
| **YBOCS (n=76, OCD patients)** |  |  |  |
| **Total** | .328** | .233 | .130 |
| **Obsessions** | .294** | .175 | .058 |
| **Compulsions** | .331** | .249* | .187 |
| **ADC (n=48, AUD patients)** |  |  |  |
| **Total** | .477** | .511** | .210 |
| **Loss of Behavioral Control** | .494** | .405** | .293* |
| **Obsessive-compulsive drinking** | .323* | .375** | -.020 |
| **Withdrawal** | .269 | .511** | .210 |

BIS: Behavior inhibition Scale; BAS: Behavior Activation Scale; UPPS-P: Urgency, (lack of) Premeditation, (lack of) Perseverance, Sensation seeking, and Positive Urgency (UPPS-P) Impulsive Behavior Scale; YBOCS: Yale-Brown Obsessive-Compulsive Scale; ADC: Alcohol Dependence Scale ; AUD: Alcohol Use Disorder; OCD: Obsessive-Compulsive Disorder; *p<.05; **p<.01
